# Supplementary material for: Design, fabrication and characterization of monolithic embedded parylene microchannels in silicon substrate
Source: Royal Society of Chemistry journal article supplement (doi:10.1039/b600224b), 2006-01-01
Supplement: b600224b-sf2.pdf [file b600224b-sf2.pdf]

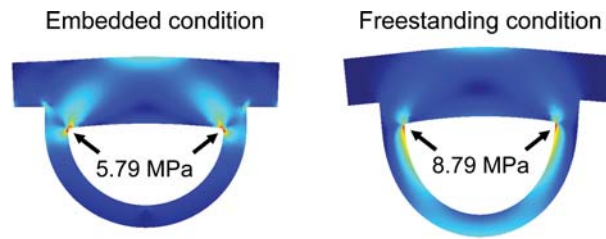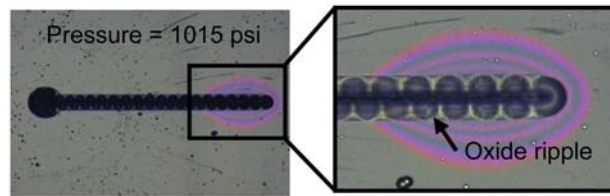

**Supplementary 2** Pressure capacity testing: (a) Stress-distribution simulation of parylene column under 100 psi pressure loading condition. Stress values are in von Mises definition; (b) Color image of Fig. 7.
