# Supplementary figures and images for: Design, fabrication and characterization of monolithic embedded parylene microchannels in silicon substrate
Source: Royal Society of Chemistry journal article supplement (doi:10.1039/b600224b), 2006-01-01

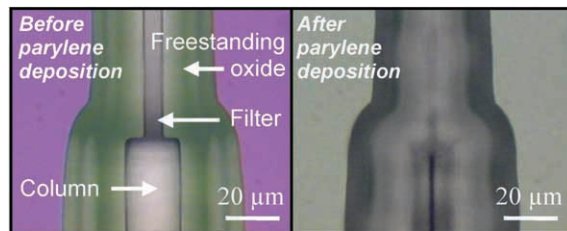

(a)

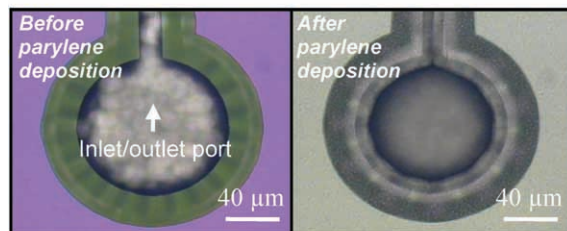

(b)

Supplement: b600224b-sf1.pdf [file b600224b-sf1.pdf]

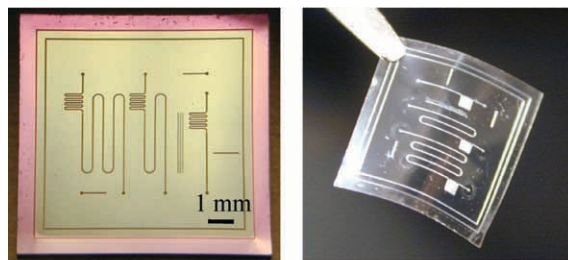

(a)

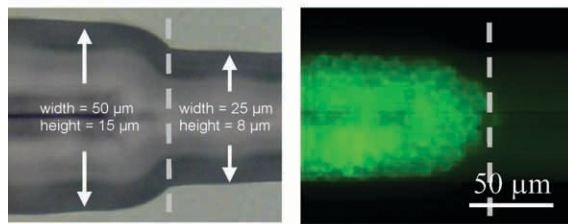

(b)

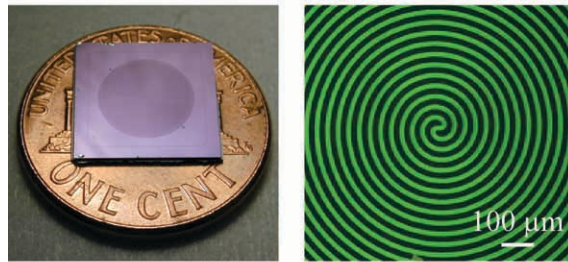

(c)

Supplement: b600224b-sf3.pdf [file b600224b-sf3.pdf]
